# Supplementary material
Source: publisher figshare collection journal article supplement (https://geolsoc.figshare.com/ndownloader/files/22731929)
Supplement: Supplementary file 1 [file 22731929]

| Sample nb | NCB 33 | NCB 38 | NCB 109 | NCB 138 | NCB 154 | NCB 182 | NCB 115-1 | NCB 117 | TWK-2.12 | NCB 137 | NCB 184 | NCB 153 | NCB 156 |
| --- | --- | --- | --- | --- | --- | --- | --- | --- | --- | --- | --- | --- | --- |
| Location | Val. Boghen | Val. Boghen | C.Roussettes | Gd Couli | Gd Couli | Pwanaki (Atéu) | C.Roussettes | Netchaot | Pombei | Nérin | Atéu | Ouango | val Boghen |
| Eastings | 165.7033 | 165 .6576 | 165.4840 | 165.8213 | 165.8196 | 164.8952 | 165.4254 | 164.9186 | 165.1493 | 165.3193 | 164.9135 | 164.7120 | 165.6695 |
| Northings | -21.5584 | -21.5852 | -21.4513 | -21.6278 | -21.6283 | -20.9840 | -21.3481 | -21.0428 | -20.9037 | -21.3065 | -20.9607 | -20.8049 | -21.5805 |
| Rock type | metabasalt | metapillow | metabasalt | metabasalt | metadolerite | metabasalt | blueschist | blueschist | greenschist | blueschist | greenschist | metagreywacke | metagreywacke |
| Affinity | BABB | TMORB | OIB | OIB | TMORB | BABB | OIB | BABB | IAB | BABB | IAB | IAB | TMORB |
|  |  |  |  |  |  |  |  |  |  |  |  |  |  |
| SiO2 | 48.81 | 47.14 | 45.13 | 45.00 | 46.60 | 43.73 | 41.58 | 46.16 | 66.80 | 46.41 | 58.02 | 68.80 | 45.02 |
| TiO2 | 1.27 | 1.77 | 3.41 | 2.12 | 2.14 | 2.69 | 2.40 | 1.16 | 0.52 | 2.38 | 1.09 | 0.66 | 1.93 |
| Al203 | 14.75 | 14.10 | 15.26 | 16.21 | 14.98 | 14.73 | 14.38 | 14.96 | 14.86 | 13.81 | 15.91 | 14.93 | 14.94 |
| Fe203 | 11.16 | 10.98 | 13.20 | 8.75 | 10.80 | 15.81 | 12.66 | 10.02 | 5.03 | 14.82 | 8.35 | 4.58 | 10.99 |
| MnO | 0.16 | 0.17 | 0.19 | 0.13 | 0.17 | 0.22 | 0.17 | 0.15 | 0.11 | 0.20 | 0.19 | 0.06 | 0.20 |
| MgO | 5.57 | 6.94 | 3.68 | 6.18 | 6.18 | 5.89 | 7.01 | 6.29 | 1.74 | 7.05 | 3.42 | 1.08 | 10.16 |
| CaO | 9.22 | 11.45 | 9.92 | 11.61 | 10.12 | 8.68 | 11.14 | 12.84 | 3.16 | 6.76 | 5.35 | 1.17 | 6.78 |
| Na20 | 3.52 | 3.82 | 4.40 | 3.95 | 3.10 | 3.94 | 2.46 | 3.13 | 2.88 | 3.62 | 2.51 | 3.83 | 3.09 |
| K20 | 1.89 | 0.00 | 0.87 | 0.06 | 0.06 | 0.60 | 0.82 | 0.13 | 2.10 | 0.90 | 2.11 | 2.19 | 1.33 |
| P205 | 0.14 | 0.26 | 0.53 | 0.52 | 0.35 | 0.23 | 0.46 | 0.07 | 0.22 | 0.24 | 0.22 | 0.12 | 0.29 |
| LOI | 3.37 | 3.30 | 3.87 | 5.57 | 4.57 | 3.56 | 7.02 | 4.92 | 2.52 | 4.08 | 3.48 | 2.19 | 4.47 |
| Total | 99.86 | 99.93 | 100.46 | 100.09 | 99.08 | 100.09 | 100.10 | 99.83 | 100.00 | 100.27 | 100.64 | 99.61 | 99.20 |
|  |  |  |  |  |  |  |  |  |  |  |  |  |  |
| Ba |  |  |  | 42.37 | 25.21 | 42.02 |  | 6.18 | 543.2 | 75.66 | 554.4 | 455.6 | 71.60 |
| Ce | 9.18 | 21.75 | 84.22 | 51.27 | 30.82 | 17.11 | 57.15 | 5.62 | 50.20 | 16.93 | 41.83 | 42.37 | 25.88 |
| Co | 38.30 | 40.50 | 38.47 | 37.73 | 34.38 | 41.89 | 48.98 | 41.37 | 11.26 | 49.91 | 21.16 | 11.26 | 43.14 |
| Cr |  |  |  | 277.1 | 170.6 | 142.9 |  | 425.5 | 3.92 | 128.7 | 88.98 | 42.66 | 349.8 |
| Dy | 4.87 | 5.22 | 6.70 | 4.84 | 7.10 | 9.50 | 5.01 | 4.26 | 4.74 | 8.36 | 5.04 | 3.37 | 5.78 |
| Er | 3.20 | 2.94 | 3.32 | 2.51 | 4.26 | 5.67 | 2.31 | 2.72 | 2.94 | 4.95 | 2.89 | 1.96 | 3.31 |
| Eu | 1.03 | 1.35 | 2.85 | 1.90 | 1.92 | 2.11 | 2.20 | 0.98 | 1.23 | 1.96 | 1.39 | 1.07 | 1.70 |
| Ga | 18.00 | 20.10 | 26.37 | 19.23 | 20.66 | 20.77 | 20.77 | 17.32 |  | 19.39 | 19.81 | 18.39 | 19.04 |
| Gd | 3.61 | 4.62 | 7.96 | 5.55 | 6.71 | 8.01 | 5.83 | 3.77 | 5.22 | 7.23 | 5.00 | 3.60 | 5.60 |
| Hf | 1.97 | 3.16 | 5.86 | 4.55 | 4.38 | 4.70 | 4.58 | 1.84 | 4.56 | 4.14 | 3.97 | 4.90 | 3.68 |
| Ho | 1.22 | 1.17 | 1.26 | 0.92 | 1.47 | 1.98 | 0.90 | 0.93 | 1.02 | 1.69 | 1.02 | 0.67 | 1.17 |
| La | 3.39 | 8.74 | 43.37 | 25.12 | 12.23 | 5.49 | 26.08 | 1.56 | 21.80 | 5.71 | 18.36 | 20.16 | 10.36 |
| Lu | 0.55 | 0.56 | 0.44 | 0.35 | 0.65 | 0.90 | 0.29 | 0.43 | 0.46 | 0.78 | 0.47 | 0.34 | 0.48 |
| Nb | 2.35 | 10.90 | 58.54 | 37.86 | 12.49 | 1.72 | 30.34 | 0.77 | 8.42 | 2.38 | 8.40 | 7.14 | 10.81 |
| Nd | 8.37 | 15.40 | 40.73 | 25.07 | 20.40 | 17.47 | 28.59 | 6.45 | 24.12 | 15.88 | 21.39 | 19.90 | 17.09 |
| Pb |  |  |  | 1.61 | 0.99 | <DL |  | <DL | 29.06 | 1.32 | 10.90 | 14.94 | <DL |
| Pr | 1.54 | 3.08 | 10.24 | 6.19 | 4.40 | 3.19 | 6.91 | 1.14 | 6.10 | 3.02 | 5.15 | 5.11 | 3.65 |
| Rb | 51.70 | 1.16 | 17.99 | 0.96 | <DL | 15.47 | 18.13 | 3.11 | 83.84 | 23.38 | 60.44 | 69.85 | 31.95 |
| Sm | 2.93 | 4.22 | 8.59 | 5.60 | 5.63 | 6.18 | 6.24 | 2.54 | 5.22 | 5.56 | 5.13 | 4.14 | 4.81 |
| Sr | 61.20 | 80.00 | 636.30 | 273.30 | 140.00 | 113.10 | 456.40 | 114.30 | 440.11 | 92.98 | 204.00 | 93.48 | 95.26 |
| Ta | 0.18 | 0.85 | 4.39 | 2.72 | 0.96 | 0.16 | 2.53 | 0.07 | 0.51 | 0.22 | 0.67 | 0.61 | 0.87 |
| Tb | 0.70 | 0.79 | 1.20 | 0.84 | 1.12 | 1.42 | 0.87 | 0.68 | 0.79 | 1.26 | 0.81 | 0.57 | 0.92 |
| Th | 0.20 | 0.81 | 4.65 | 3.15 | 1.06 | 0.11 | 2.81 | <DL | 6.69 | 0.27 | 5.88 | 7.93 | 0.87 |
| Tm | 0.51 | 0.45 | 0.47 | 0.34 | 0.63 | 0.87 | 0.34 | 0.40 |  | 0.74 | 0.43 | 0.30 | 0.49 |
| U |  |  |  | 0.94 | 0.32 | 0.11 |  | <DL | 1.63 | 0.13 | 1.19 | 1.95 | 0.32 |
| V | 309.0 | 298.0 | 361.9 | 177.2 | 262.6 | 464.7 | 182.9 | 290.0 |  | 415.4 | 154.4 | 77.52 | 276.4 |
| Y | 32.40 | 31.00 | 35.21 | 25.99 | 41.23 | 54.86 | 25.95 | 26.46 | 35.39 | 48.21 | 27.87 | 19.48 | 32.55 |
| Yb | 3.21 | 2.81 | 2.98 | 2.31 | 4.26 | 5.82 | 1.99 | 2.68 | 2.89 | 4.98 | 2.98 | 2.10 | 3.17 |
| Zr | 71.0 | 133.0 | 260.4 | 205.0 | 198.8 | 174.8 | 199.2 | 59.21 | 203.9 | 157.9 | 146.4 | 185.5 | 146.5 |
